# Supplementary material for: Functional Conservation of Cis-Regulatory Elements of Heat-Shock Genes over Long Evolutionary Distances
Source: PubMed Central journal article supplement (PMC3143172; doi:10.1371/journal.pone.0022677), 2011-07-25
Supplement: pone.0022677.s003.pdf [file pone.0022677.s003.pdf]

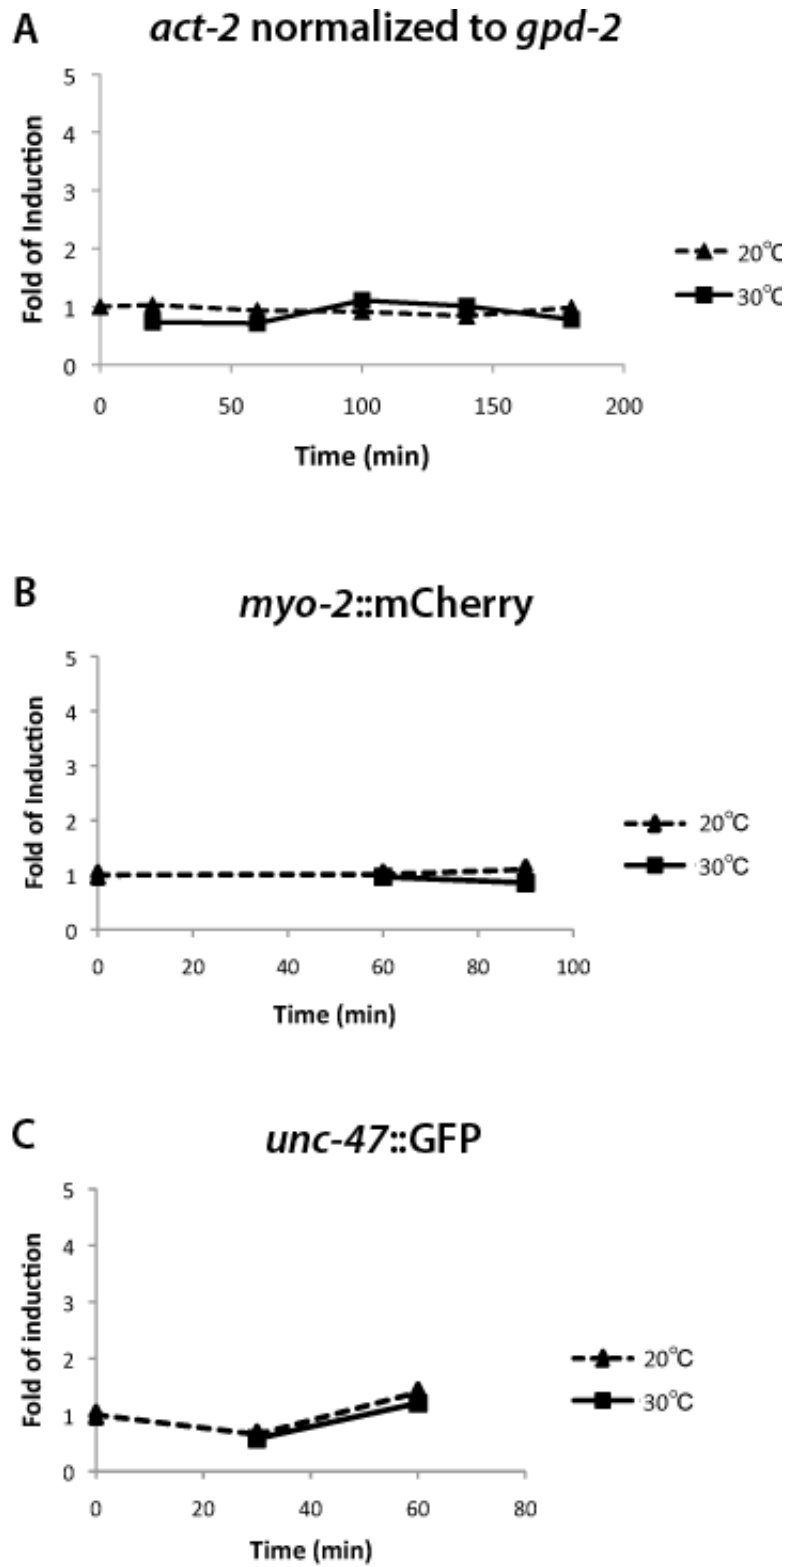

Figure S3
